# Supplementary material
Source: Research Square preprint supplement (doi:10.21203/rs.3.rs-8331792/v1)
Supplement: Supplementary file 2 [file 8e45bc2ada5e332cfc230ac4.xlsx]

## Sheet: Sheet1
Number	Video length	Likes	Collections	Comments	Shares	Uploader	GQS	mDISCERN	platform	Epidemiology	Etiology	Clinical manifestations	Diagnosis	Treatment	Prevention	Prognosis
1	38	636	156	288	526	Professional individual	3	3	Tiktok	0	1	1	0	0	0	0
2	161	1243	244	72	1015	Non-Professional individual	4	3	Tiktok	1	1	1	0	0	1	1
3	32	3242	849	1063	764	Professional individual	2	2	Tiktok	0	0	1	1	0	0	0
4	164	9898	483	1422	1144	Non-Professional individual	3	2	Tiktok	0	0	1	1	0	1	1
5	143	1062	306	1666	2148	Non-Professional individual	3	4	Tiktok	1	0	0	1	0	1	0
6	127	7771	1841	3346	5591	Professional individual	3	2	Tiktok	1	1	0	0	0	0	0
7	20	248	39	341	41	Professional individual	3	2	Tiktok	0	0	0	1	0	0	0
8	95	11447	1570	518	11474	Institution	4	4	Tiktok	0	1	1	1	0	1	0
9	116	70753	2908	13930	9517	Non-Professional individual	1	1	Tiktok	0	0	0	0	0	0	0
10	343	112734	5340	14331	4383	Non-Professional individual	4	2	Tiktok	0	0	1	1	1	0	1
11	119	103	24	47	51	Non-Professional individual	3	2	Tiktok	0	0	1	1	0	1	0
12	105	3444	504	1965	1189	Professional individual	4	3	Tiktok	1	1	1	1	0	1	0
13	37	338	66	335	439	Professional individual	3	1	Tiktok	0	0	0	1	0	0	0
14	124	5129	793	1525	1762	Non-Professional individual	4	3	Tiktok	1	1	1	0	1	0	1
15	144	1157	271	231	751	Professional individual	5	3	Tiktok	0	1	1	1	1	1	1
16	67	869	288	721	610	Professional individual	4	3	Tiktok	0	1	0	1	1	1	0
17	64	9038	1502	3081	5764	Professional individual	3	3	Tiktok	0	1	0	1	0	0	0
18	58	3089	409	3139	427	Professional individual	2	0	Tiktok	0	0	0	1	0	0	0
19	74	9129	1232	3632	5945	Professional individual	3	2	Tiktok	1	1	1	1	1	1	0
20	41	7506	930	925	2313	Professional individual	4	2	Tiktok	0	1	1	1	1	1	0
21	126	269	74	94	575	Professional individual	4	3	Tiktok	0	0	1	1	1	1	1
22	69	2748	443	1612	902	Professional individual	3	2	Tiktok	0	0	0	1	0	0	1
23	118	692	377	552	425	Professional individual	4	2	Tiktok	0	0	0	1	0	0	0
24	48	12522	1860	8879	21505	Professional individual	3	2	Tiktok	1	0	0	1	0	0	0
25	63	1632	256	276	226	Professional individual	3	2	Tiktok	1	1	1	0	0	0	0
26	93	75	9	3	21	Professional individual	3	2	Tiktok	0	1	1	1	0	0	0
27	108	688	187	261	234	Professional individual	2	1	Tiktok	0	0	0	1	0	0	0
28	92	74	18	5	15	Institution	3	2	Tiktok	0	1	1	0	1	0	1
29	43	103	3	28	25	Professional individual	2	2	Tiktok	0	0	0	0	0	0	0
30	83	27	13	0	11	Professional individual	3	2	Tiktok	0	1	0	1	0	1	0
31	95	1657	713	842	2947	Professional individual	4	2	Tiktok	0	1	1	1	0	0	0
32	79	60	18	24	31	Professional individual	4	3	Tiktok	1	1	1	0	1	0	1
33	42	5049	1317	6141	14530	Professional individual	3	2	Tiktok	1	0	0	1	0	0	0
34	28	3573	423	1197	276	Non-Professional individual	2	1	Tiktok	0	0	0	1	0	0	0
35	205	799	449	141	528	Professional individual	4	4	Tiktok	0	0	0	1	0	0	0
36	55	253	81	858	303	Professional individual	3	2	Tiktok	0	0	0	1	0	0	0
37	57	544	81	183	128	Professional individual	4	2	Tiktok	1	1	1	0	1	0	1
38	395	1412	308	68	132	Institution	2	0	Tiktok	1	1	0	1	1	0	0
39	36	725	235	349	454	Professional individual	2	2	Tiktok	1	0	0	0	0	0	0
40	39	4321	2266	1535	1780	Professional individual	2	1	Tiktok	0	0	0	1	0	0	0
41	58	4564	808	360	3831	Professional individual	4	1	Tiktok	1	1	1	1	0	1	0
42	103	919	426	228	2087	Non-Professional individual	2	1	Tiktok	1	0	0	1	0	0	0
43	251	13034	2760	3868	4355	Professional individual	5	3	Tiktok	0	1	1	1	1	1	1
44	277	11158	3723	1779	9353	Professional individual	4	2	Tiktok	0	1	1	1	1	1	1
45	43	517	147	84	332	Professional individual	3	2	Tiktok	0	0	1	0	0	0	0
46	52	299	86	85	89	Professional individual	2	2	Tiktok	0	1	0	0	0	0	0
47	100	3115	671	1543	3801	Non-Professional individual	2	2	Tiktok	0	0	0	1	0	0	0
48	68	129	32	18	95	Institution	3	3	Tiktok	1	0	0	0	0	0	1
49	25	4988	1097	2640	5908	Professional individual	2	1	Tiktok	0	0	0	1	0	0	0
50	99	11495	563	3272	1989	Professional individual	3	3	Tiktok	0	0	0	1	0	0	0
51	106	162	33	103	37	Professional individual	3	2	Tiktok	0	0	1	1	0	0	0
52	183	2652	520	91	361	Professional individual	5	2	Tiktok	1	1	1	1	0	1	0
53	40	1199	304	563	1549	Professional individual	3	3	Tiktok	0	0	0	1	0	0	0
54	37	9110	771	3937	3037	Professional individual	3	3	Tiktok	0	0	0	1	0	0	0
55	72	56	12	8	46	Institution	2	0	Tiktok	0	0	0	1	0	0	0
56	138	96	24	4	11	Professional individual	4	2	Tiktok	0	1	1	1	0	1	1
57	315	16402	7630	3134	13632	Professional individual	3	3	Tiktok	0	1	1	1	0	0	0
58	62	612	128	131	446	Professional individual	3	2	Tiktok	0	0	1	0	0	0	0
59	181	2960	1147	1243	2336	Professional individual	2	2	Tiktok	0	0	0	1	0	0	0
60	29	587	109	237	446	Professional individual	3	2	Tiktok	1	0	1	0	0	0	1
61	60	434	144	249	375	Professional individual	3	2	Tiktok	0	0	0	1	0	0	0
62	108	4848	1167	661	1868	Professional individual	4	2	Tiktok	0	1	1	1	1	1	1
63	149	2656	277	175	824	Professional individual	5	2	Tiktok	1	1	1	1	1	1	0
64	121	57	6	10	19	Professional individual	4	4	Tiktok	1	0	0	1	0	0	1
65	73	688	142	235	729	Professional individual	3	3	Tiktok	0	0	0	1	0	0	0
66	56	233	43	11	279	Non-Professional individual	1	1	Tiktok	0	0	0	0	0	0	0
67	163	6334	476	1019	708	Non-Professional individual	4	2	Tiktok	0	1	1	1	1	0	1
68	51	1296	121	109	83	Professional individual	3	2	Tiktok	0	1	0	0	1	0	1
69	74	57	9	1	7	Professional individual	4	2	Tiktok	1	1	1	1	0	1	0
70	54	37	8	2	5	Professional individual	3	2	Tiktok	0	1	1	1	0	1	1
71	54	555	96	380	162	Professional individual	2	1	Tiktok	0	0	0	1	0	0	0
72	125	287	86	98	151	Professional individual	3	2	Tiktok	1	1	1	0	0	0	0
73	38	297	78	49	205	Professional individual	2	2	Tiktok	0	0	0	1	0	0	0
74	61	417	126	195	307	Professional individual	3	3	Tiktok	0	0	0	1	0	0	0
75	99	71	20	10	44	Institution	3	2	Tiktok	0	1	1	1	1	1	0
76	93	2238	1711	826	6248	Non-Professional individual	2	1	Tiktok	0	0	0	1	0	0	0
77	26	928	352	227	1077	Professional individual	3	2	Tiktok	0	0	0	1	0	0	0
78	100	62	4	8	6	Professional individual	4	2	Tiktok	0	1	1	1	0	1	0
79	87	21	16	6	25	Non-Professional individual	3	3	Tiktok	0	0	0	1	0	0	0
80	75	2345	617	119	873	Professional individual	3	2	Tiktok	0	0	0	1	0	0	0
81	65	172	45	6	79	Professional individual	4	2	Tiktok	0	1	1	1	1	1	0
82	37	772	25	309	125	Non-Professional individual	2	2	Tiktok	0	0	0	1	0	0	0
83	47	622	171	928	647	Professional individual	3	2	Tiktok	0	0	0	1	0	0	0
84	47	1836	400	496	1888	Professional individual	3	2	Tiktok	0	0	0	1	0	0	0
85	79	2356	516	5031	7048	Professional individual	3	2	Tiktok	0	0	0	1	0	0	0
86	52	695	207	685	806	Professional individual	3	2	Tiktok	0	0	0	1	0	0	0
87	62	136	21	16	49	Professional individual	3	2	Tiktok	0	0	0	1	0	0	0
88	28	96	17	5	23	Professional individual	3	2	Tiktok	0	0	0	1	0	0	0
89	51	20817	1470	261	3196	Non-Professional individual	1	0	Tiktok	0	0	0	0	0	0	0
90	38	16375	755	1545	4261	Non-Professional individual	1	0	Tiktok	0	0	0	1	0	0	0
91	40	79	15	13	37	Professional individual	3	2	Tiktok	0	0	1	0	0	0	0
92	37	139	39	53	162	Professional individual	3	2	Tiktok	0	0	0	1	0	0	0
93	79	59	9	1	35	Professional individual	4	3	Tiktok	0	0	0	1	0	0	0
94	53	1104	96	163	344	Professional individual	3	2	Tiktok	1	0	0	1	0	0	0
95	155	1651	431	513	1148	Professional individual	3	3	Tiktok	0	0	0	1	0	0	0
96	105	473	150	131	817	Professional individual	3	2	Tiktok	0	0	0	1	0	0	0
97	91	62	7	5	7	Professional individual	4	2	Tiktok	0	1	1	1	0	0	1
98	55	4569	527	378	1724	Professional individual	3	2	Tiktok	0	1	0	0	0	0	0
99	26	204	48	253	342	Professional individual	3	2	Tiktok	0	0	0	1	0	0	0
100	77	7	1	0	4	Professional individual	3	2	Tiktok	0	1	1	1	0	0	0
101	146	1508	398	106	1298	Institution	5	3	Tiktok	1	1	1	1	1	1	0
102	46	49	23	36	64	Professional individual	3	2	Tiktok	0	0	0	1	0	0	0
103	75	69	45	43	53	Non-Professional individual	3	3	Tiktok	0	0	0	1	0	0	0
104	44	806	174	674	119	Professional individual	3	1	Tiktok	1	0	0	0	0	0	0
105	118	7442	620	1389	1245	Professional individual	3	3	Tiktok	0	1	0	1	0	0	0
106	66	30	4	42	7	Non-Professional individual	2	1	Tiktok	0	0	0	1	0	0	0
107	87	52	21	2	26	Professional individual	4	2	Tiktok	0	1	1	1	0	0	0
108	61	683	184	315	313	Professional individual	3	2	Tiktok	0	1	1	0	0	0	0
109	469	1012	341	94	211	Non-Professional individual	5	2	Tiktok	1	1	1	1	1	0	1
110	149	105	16	4	9	Professional individual	4	2	Tiktok	0	1	1	1	0	1	0
111	101	4132	587	3513	2707	Professional individual	3	3	Tiktok	0	0	0	1	0	0	0
112	59	441	87	448	104	Professional individual	2	2	Tiktok	0	0	1	1	0	0	0
113	33	358	81	26	232	Professional individual	3	2	Tiktok	0	0	0	1	0	0	0
114	103	379	53	297	548	Non-Professional individual	2	1	Tiktok	0	0	0	1	0	0	0
115	99	143	58	25	88	Non-Professional individual	3	3	Tiktok	0	0	0	1	0	0	0
116	52	29	4	2	3	Professional individual	2	2	Tiktok	0	1	1	0	0	0	0
117	43	1216	145	110	195	Professional individual	3	2	Tiktok	0	1	1	1	0	1	0
118	20	359	56	225	139	Professional individual	2	0	Tiktok	0	0	0	1	0	0	1
119	107	33544	593	4853	572	Non-Professional individual	3	2	Tiktok	0	0	1	1	0	0	1
120	45	24794	1401	1323	5826	Non-Professional individual	1	1	Tiktok	0	0	0	0	0	0	0
121	222	2107	153	76	194	Professional individual	5	3	Tiktok	1	1	1	1	0	1	1
122	81	186	35	61	77	Institution	3	2	Tiktok	0	0	0	1	0	0	0
123	88	117	44	8	192	Non-Professional individual	3	3	Tiktok	0	0	0	1	0	0	0
124	38	371	37	45	110	Professional individual	3	2	Tiktok	0	0	0	1	0	0	0
125	81	2730	181	72	170	Professional individual	3	2	Tiktok	0	1	1	1	0	1	0
126	58	127	14	12	35	Professional individual	3	2	Tiktok	0	1	1	1	1	1	0
127	82	2047	370	562	340	Non-Professional individual	2	2	Tiktok	0	0	1	1	0	0	0
128	66	284	39	75	79	Professional individual	4	2	Tiktok	0	0	1	1	1	1	1
129	98	23	1	0	4	Non-Professional individual	3	2	Tiktok	0	0	0	1	0	0	0
130	77	70	16	8	41	Institution	3	2	Tiktok	0	0	0	1	0	0	0
131	302	78	18	6	40	Institution	5	3	Tiktok	1	1	1	1	1	1	1
132	112	168814	5999	21909	11640	Non-Professional individual	4	2	Tiktok	0	1	1	1	0	0	1
133	83	162	15	6	7	Professional individual	4	2	Tiktok	0	1	1	1	1	1	0
134	98	86	22	52	34	Professional individual	3	2	Tiktok	0	1	1	0	1	0	0
135	59	66	21	3	13	Professional individual	3	2	Tiktok	0	1	1	1	0	0	1
136	48	1159	398	2163	1185	Professional individual	3	3	Tiktok	0	0	0	1	0	0	0
137	44	72	22	12	6	Professional individual	2	2	Tiktok	0	0	0	0	0	1	0
138	83	967	259	935	1342	Non-Professional individual	2	2	Tiktok	0	0	0	1	0	0	0
139	56	17676	1290	1361	2166	Institution	2	2	Tiktok	0	0	0	0	1	0	1
140	102	105	13	6	11	Professional individual	3	2	Tiktok	0	1	1	0	0	1	0
141	31	455	72	155	30	Professional individual	2	2	Tiktok	0	0	1	0	0	0	0
142	44	71	14	7	7	Professional individual	4	2	Tiktok	0	1	1	1	0	1	0
143	58	295	80	43	113	Professional individual	4	2	Tiktok	0	1	1	1	0	1	1
144	107	31	12	1	5	Professional individual	4	3	Tiktok	0	1	1	1	1	1	1
145	172	22000	2203	1403	2019	Non-Professional individual	4	2	Bilibili	0	1	1	0	0	1	0
146	865	6248	1625	596	855	Non-Professional individual	3	2	Bilibili	0	0	1	0	0	0	0
147	287	652	61	36	3	Non-Professional individual	2	0	Bilibili	0	1	1	0	0	0	0
148	157	21	41	4	69	Non-Professional individual	4	2	Bilibili	1	1	1	1	0	1	0
149	778	1250	228	83	70	Non-Professional individual	3	3	Bilibili	0	1	0	0	0	0	0
150	357	217	150	23	203	Non-Professional individual	4	3	Bilibili	0	0	1	0	0	0	1
151	234	4233	1108	528	712	Non-Professional individual	4	3	Bilibili	0	1	1	1	1	0	1
152	160	13000	1057	774	297	Non-Professional individual	4	3	Bilibili	0	0	0	0	0	0	1
153	84	841	61	261	29	Non-Professional individual	3	4	Bilibili	0	1	1	1	0	0	0
154	931	23	50	1	31	Institution	4	3	Bilibili	1	1	1	1	0	0	0
155	317	10	4	2	4	Non-Professional individual	4	4	Bilibili	1	1	1	1	1	0	0
156	2035	487	90	168	26	Institution	4	4	Bilibili	0	1	1	1	0	1	1
157	395	3101	1030	343	406	Non-Professional individual	2	1	Bilibili	0	1	1	0	0	0	0
158	207	9892	2438	1826	1971	Non-Professional individual	4	3	Bilibili	0	1	1	1	0	1	1
159	168	50000	2927	561	649	Non-Professional individual	4	3	Bilibili	0	1	1	0	1	0	1
160	352	41	11	2	14	Institution	4	2	Bilibili	0	1	1	0	0	1	1
161	286	350	276	15	314	Non-Professional individual	4	5	Bilibili	0	1	1	1	0	1	1
162	80	419	103	12	280	Institution	4	3	Bilibili	0	1	1	1	1	1	0
163	165	2367	336	123	366	Non-Professional individual	3	2	Bilibili	0	1	1	0	0	1	1
164	286	5638	376	498	225	Non-Professional individual	3	1	Bilibili	0	0	0	0	0	0	0
165	479	126	117	6	38	Institution	4	4	Bilibili	1	1	1	1	0	0	0
166	403	1108	5491	204	66	Non-Professional individual	3	3	Bilibili	0	0	1	0	0	0	0
167	113	8253	380	187	33	Institution	3	3	Bilibili	0	0	0	0	0	0	0
168	62	878	84	289	42	Non-Professional individual	3	3	Bilibili	0	0	0	0	0	0	0
169	452	8830	2307	542	581	Professional individual	4	2	Bilibili	0	1	1	0	0	0	1
170	60	20000	3926	241	365	Non-Professional individual	3	2	Bilibili	0	0	0	0	0	0	0
171	1111	30	43	3	18	Institution	4	3	Bilibili	1	1	1	1	1	1	0
172	327	44	44	2	59	Non-Professional individual	4	4	Bilibili	1	1	1	1	0	1	0
173	132	695	356	667	1059	Non-Professional individual	2	1	Bilibili	0	0	0	0	0	0	0
174	503	50	14	5	14	Institution	3	2	Bilibili	0	0	1	0	0	0	1
175	132	9	10	0	30	Non-Professional individual	3	3	Bilibili	0	0	1	0	0	0	1
176	89	31	11	1	45	Non-Professional individual	4	3	Bilibili	0	1	1	1	1	1	0
177	301	840	191	1366	397	Non-Professional individual	3	2	Bilibili	0	0	0	0	0	0	1
178	19	10	8	1	3	Non-Professional individual	3	2	Bilibili	0	1	1	0	0	0	0
179	299	11	5	5	2	Professional individual	4	3	Bilibili	1	1	1	1	1	1	0
180	363	6	4	0	0	Institution	2	2	Bilibili	0	0	0	0	0	0	0
181	273	254	90	37	95	Institution	3	2	Bilibili	1	1	1	0	0	0	1
182	64	129	17	21	27	Institution	2	1	Bilibili	0	0	0	0	0	0	0
183	99	8964	954	273	293	Institution	2	1	Bilibili	0	0	0	0	0	0	0
184	320	5752	652	53	62	Professional individual	3	3	Bilibili	1	1	0	1	0	1	0
185	139	87	28	13	0	Non-Professional individual	4	3	Bilibili	0	1	1	1	0	1	1
186	119	3	0	3	1	Institution	2	1	Bilibili	0	0	0	0	0	0	0
187	43	4286	353	388	473	Non-Professional individual	1	1	Bilibili	0	0	0	0	0	0	0
188	4759	196	304	54	121	Non-Professional individual	2	2	Bilibili	0	0	1	0	0	0	0
189	443	1946	374	392	317	Non-Professional individual	3	2	Bilibili	1	1	1	0	0	0	1
190	313	15	44	4	101	Non-Professional individual	4	2	Bilibili	0	1	1	1	1	1	1
191	66	6	3	1	6	Institution	3	2	Bilibili	0	1	1	1	1	0	0
192	115	326	39	292	9	Non-Professional individual	2	2	Bilibili	0	0	0	0	0	0	0
193	181	1733	294	821	103	Non-Professional individual	2	2	Bilibili	0	0	0	0	0	1	0
194	155	30	22	15	52	Non-Professional individual	2	1	Bilibili	0	0	0	0	0	0	0
195	50	74	27	11	7	Non-Professional individual	2	1	Bilibili	0	0	0	0	0	0	0
196	66	93	9	22	4	Non-Professional individual	2	2	Bilibili	0	0	0	0	0	0	1
197	43	3200	107	40	16	Non-Professional individual	2	2	Bilibili	0	0	0	0	0	0	1
198	49	183	54	61	405	Professional individual	3	2	Bilibili	0	0	0	1	0	1	0
199	642	8622	2194	702	525	Institution	3	3	Bilibili	0	0	1	0	0	0	1
200	55	0	0	0		Institution	3	2	Bilibili	0	1	0	1	0	1	0
201	152	39	21	4	3	Non-Professional individual	2	2	Bilibili	0	0	0	0	0	1	1
202	126	2	1	0	1	Non-Professional individual	3	2	Bilibili	0	1	1	1	0	1	0
203	103	43000	3549	3472	4466	Institution	2	1	Bilibili	0	0	1	0	0	1	0
204	127	36000	1700	76	86	Non-Professional individual	2	2	Bilibili	0	0	0	0	0	0	1
205	396	92	28	5	14	Professional individual	3	3	Bilibili	0	1	1	1	1	0	0
206	138	6007	261	508	86	Institution	2	1	Bilibili	0	0	0	0	0	0	0
207	197	5	5	0	5	Institution	4	2	Bilibili	1	1	1	1	1	1	1
208	89	0	0	0	0	Institution	3	3	Bilibili	1	1	1	1	1	1	0
209	155	468	149	131	112	Non-Professional individual	3	2	Bilibili	0	1	0	1	0	1	0
210	235	38	16	3	4	Institution	2	2	Bilibili	0	1	1	0	0	0	0
211	351	9	8	1	13	Non-Professional individual	3	2	Bilibili	0	1	1	1	1
212	590	204	93	18	54	Professional individual	3	2	Bilibili	1	1	1	0	0	1	1
213	59	4953	395	105	61	Non-Professional individual	2	1	Bilibili	0	0	0	0	0	0	0
214	229	18	10	2	4	Professional individual	3	3	Bilibili	0	1	1	0	0	0	0
215	84	0	0	0	0	Non-Professional individual	2	2	Bilibili	0	0	0	0	0	0	1
216	52	11	8	12	2	Non-Professional individual	2	1	Bilibili	0	0	1	0	0	0	0
217	307	304	209	12	232	Non-Professional individual	3	2	Bilibili	0	1	0	1	0	1	0
218	82	0	0	0	0	Non-Professional individual	3	2	Bilibili	0	1	1	0	0	0	1
219	84	163	30	16	3	Non-Professional individual	2	1	Bilibili	0	0	0	0	0	0	0
220	70	39	13	0	1	Non-Professional individual	2	2	Bilibili	0	0	0	0	0	0	0
221	30	278	59	47	46	Institution	2	2	Bilibili	0	0	0	0	0	0	0
222	133	15	9	0	5	Institution	2	2	Bilibili	0	1	1	0	0	0	0
223	549	33	18	4	4	Non-Professional individual	2	2	Bilibili	0	1	0	0	0	0	0
224	213	39	7	7	8	Non-Professional individual	2	2	Bilibili	0	0	0	0	0	0	1
225	141	35	34	0	44	Institution	3	2	Bilibili	0	1	1	1	0	1	0
226	270	1969	72	60	22	Non-Professional individual	2	1	Bilibili	0	0	0	0	0	0	1
227	109	337	88	19	26	Non-Professional individual	1	0	Bilibili	0	0	0	0	0	0	0
228	41	833	43	93	5	Non-Professional individual	2	2	Bilibili	0	0	0	0	0	0	1
229	64	18000	597	513	123	Non-Professional individual	1	1	Bilibili	0	0	0	0	0	0	0
230	141	1	2	0	0	Professional individual	3	2	Bilibili	0	1	1	0	0	1	0
231	254	224	73	86	209	Professional individual	3	5	Bilibili	0	0	1	0	1	0	0
232	720	0	1	0	0	Institution	4	3	Bilibili	0	1	1	1	1	1	1
233	223	7642	309	416	379	Non-Professional individual	4	2	Bilibili	1	1	1	1	1	1	0
234	118	63	14	7	17	Professional individual	3	3	Bilibili	0	1	0	1	0	1	0
235	50	2138	178	294	16	Non-Professional individual	1	0	Bilibili	0	0	1	0	0	0	0
236	171	13	15	2	41	Institution	2	0	Bilibili	0	0	0	0	0	0	1
237	116	17	7	0	1	Non-Professional individual	1	0	Bilibili	0	0	0	0	0	0	0
238	79	20	2	1	8	Non-Professional individual	3	2	Bilibili	1	1	1	0	0	0	1
239	342	15	6	0	10	Non-Professional individual	3	3	Bilibili	1	1	1	0	0	0	0
240	54	4	1	0	0	Non-Professional individual	2	2	Bilibili	0	0	0	0	0	0	0
241	102	2380	267	1230	351	Non-Professional individual	2	1	Bilibili	0	0	1	0	0	0	0
242	83	62	8	14	20	Non-Professional individual	2	2	Bilibili	0	0	1	0	0	0	1
243	482	1	0	0	0	Non-Professional individual	3	2	Bilibili	0	1	1	1	0	1	0
244	187	270	169	53	42	Non-Professional individual	2	0	Bilibili	0	1	1	0	0	0	0
245	146	1445	273	154	1235	Non-Professional individual	1	0	Bilibili	0	0	0	0	0	0	0
246	47	1	0	0	0	Non-Professional individual	1	0	Bilibili	0	0	0	0	0	0	0
247	31	14	4	0	1	Non-Professional individual	1	0	Bilibili	0	0	0	0	0	0	0
248	401	8	5	0	8	Institution	2	0	Bilibili	0	0	1	0	0	0	0
249	39	39000	4719	274	6862	Non-Professional individual	1	0	Bilibili	0	0	1	0	0	0	0
250	86	46	4	7	2	Non-Professional individual	1	0	Bilibili	0	0	1	0	0	0	0
251	358	164	62	68	46	Professional individual	2	1	Bilibili	0	1	0	1	0	1	0
252	632	1312	306	322	185	Non-Professional individual	2	0	Bilibili	0	0	0	0	0	0	1
253	134	80	10	80	5	Non-Professional individual	2	1	Bilibili	0	0	1	1	0	0	0
254	613	21	2	17	8	Non-Professional individual	1	0	Bilibili	0	0	0	0	0	0	0
255	169	4752	1138	2227	360	Non-Professional individual	2	2	Bilibili	0	0	1	0	0	0	0
256	171	2464	168	187	65	Non-Professional individual	1	0	Bilibili	0	0	0	0	0	0	0
257	506	113	133	22	40	Non-Professional individual	1	0	Bilibili	0	0	0	0	0	0	0
258	15	2	0	0	0	Non-Professional individual	1	0	Bilibili	0	0	0	0	0	0	0
259	130	79	6	49	11	Non-Professional individual	1	0	Bilibili	0	0	0	0	0	0	0
260	175	7060	502	439	80	Non-Professional individual	1	0	Bilibili	0	0	0	0	0	0	0
261	235	282	115	21	66	Non-Professional individual	1	0	Bilibili	0	0	0	0	0	0	0
262	540	78	73	0	22	Non-Professional individual	1	0	Bilibili	0	0	0	0	0	0	0
263	62	124	9	3	0	Non-Professional individual	1	0	Bilibili	0	0	0	0	0	0	0
264	475	4852	1164	1176	1316	Non-Professional individual	3	2	Bilibili	1	1	1	0	1	0	0
265	534	74	49	4	21	Non-Professional individual	2	2	Bilibili	0	1	0	0	0	0	0
266	64	251	56	10	9	Non-Professional individual	1	2	Bilibili	0	0	0	0	0	0	0
267	111	69000	2627	1157	411	Non-Professional individual	1	0	Bilibili	0	0	0	0	0	0	0
268	713	391	286	78	110	Institution	3	3	Bilibili	0	1	1	0	1	0	1
269	102	23000	1379	406	180	Non-Professional individual	1	0	Bilibili	0	0	0	0	0	0	0
270	286	2421	165	37	85	Non-Professional individual	1	0	Bilibili	0	0	0	0	0	0	0
271	185	496	215	113	57	Institution	1	0	Bilibili	0	0	0	0	0	0	0
272	58	12000	984	163	78	Non-Professional individual	1	0	Bilibili	0	0	0	0	0	0	0
273	79	420	49	228	143	Non-Professional individual	1	0	Bilibili	0	0	0	0	0	0	0
274	82	12	13	1	11	Non-Professional individual	1	0	Bilibili	0	0	0	0	0	0	0
