# Supplementary material
Source: Research Square preprint supplement (doi:10.21203/rs.3.rs-8331792/v1)
Supplement: Supplementary file 2 [file eeda9084fec415dbaa767d9b.docx]

**Table S2**  The Modified DISCERN (mDISCERN) quality criteria.

| **Reliability Score** |
| --- |
| 1. Is the video clear, concise, and understandable? |
| 2. Are valid sources cited? |
| 3. Is the content presented balanced and unbiased? |
| 4. Are additional sources of content listed for patient reference? |
| 5. Are areas of uncertainty mentioned? |
